# Supplementary material for: Transglutaminase 3 negatively regulates immune responses on the heart of the mosquito, Anopheles gambiae
Source: PubMed Central journal article supplement (PMC9038791; doi:10.1038/s41598-022-10766-z), 2022-04-25
Supplement: 41598_2022_10766_MOESM1_ESM.pdf [file 41598_2022_10766_MOESM1_ESM.pdf]

**Transglutaminase 3 negatively regulates immune responses on the heart of the mosquito, *Anopheles gambiae***

Yan Yan, Abinaya Ramakrishnan, Tania Y. Estévez-Lao and Julián F. Hillyer \*

Department of Biological Sciences, Vanderbilt University, Nashville, TN, USA

julian.hillyer@vanderbilt.edu

*Scientific Reports*, 2022

**File contents:**

**Table S1.** Gene names, gene IDs, and primers used in this study.

**Figure S1.** RNAi-based knockdown efficiency of *TGase1*, *TGase2* and *TGase3*.

**Figure S2.** RNAi-based knockdown of transglutaminase genes does not alter the relative spatial distribution of periostial hemocytes.

**Table S1.** Gene names, gene IDs, and primers used in this study.

| Gene                       | VectorBase ID <sup>a</sup> | Application | Sequence (forward and reverse) <sup>b</sup>   | Amplicon (bp) <sup>c</sup> |         |
|----------------------------|----------------------------|-------------|-----------------------------------------------|----------------------------|---------|
|                            |                            |             |                                               | Transcript                 | Genomic |
| <i>RpS7</i>                | AGAP010592                 | qPCR        | GACGGATCCCAGCTGATAAA                          | 132                        | 281     |
|                            |                            | qPCR        | GTTCTCTGGGAATTCGAACG                          |                            |         |
| <i>RpS17</i>               | AGAP004887                 | qPCR        | GACGAAACCACTGCGTAACA                          | 153                        | 264     |
|                            |                            | qPCR        | TGCTCCAGTGCTGAAACATC                          |                            |         |
| <i>TGase1</i>              | AGAP009100                 | qPCR        | CTGCACAAGGGACTGTTCCA                          | 191                        | 259     |
|                            |                            | qPCR        | AACGCCAAAAAGCCATCCAC                          |                            |         |
| <i>TGase2</i>              | AGAP009098                 | qPCR        | CGGTGGACGCTGACTATCAA                          | 225                        | 297     |
|                            |                            | qPCR        | GTA CTGGCCGAGCTTCCATT                         |                            |         |
| <i>TGase3</i>              | AGAP009099                 | qPCR        | TACAGCAGCCAGCGGTTTAG                          | 236                        | 236     |
|                            |                            | qPCR        | ATATCGCGCCCAGTGTAGTC                          |                            |         |
| <i>bla(Ap<sup>R</sup>)</i> | (Bacterial gene)           | RNAi        | <u>TAATACGACTCACTATAGGGCCGAGCGCAGAAGTGGT</u>  | 214                        | 214     |
|                            |                            | RNAi        | <u>TAATACGACTCACTATAGGGAACCGAGCTGAATGAA</u>   |                            |         |
| <i>TGase1</i>              | AGAP009100                 | RNAi        | <u>TAATACGACTCACTATAGGGCATTCCGGTTAATCAGT</u>  | 361                        | 433     |
|                            |                            | RNAi        | <u>TAATACGACTCACTATAGGGCGTAGTCGATTGTAAGA</u>  |                            |         |
| <i>TGase2</i>              | AGAP009098                 | RNAi        | <u>TAATACGACTCACTATAGGGTCAGAGCTGTCTAACAAA</u> | 490                        | 490     |
|                            |                            | RNAi        | <u>TAATACGACTCACTATAGGCGTACCGCTCAACTCC</u>    |                            |         |
| <i>TGase3</i>              | AGAP009099                 | RNAi        | <u>TAATACGACTCACTATAGGGAAAACCTTCCACACGTC</u>  | 501                        | 501     |
|                            |                            | RNAi        | <u>TAATACGACTCACTATAGGGTTGAACAGCACAAACAA</u>  |                            |         |

- <sup>a</sup> Vectorbase IDs were obtained from the AgamP4 assembly in [www.vectorbase.org](http://www.vectorbase.org) (exception: *bla(Ap<sup>R</sup>)*).
- <sup>b</sup> Underlined sequences are specific to the T7 RNA polymerase promoter sites needed for dsRNA synthesis.
- <sup>c</sup> Amplicon sizes are based on the sequences in Vectorbase. For dsRNA primers, amplicon lengths include the T7 promoter sequence tags.

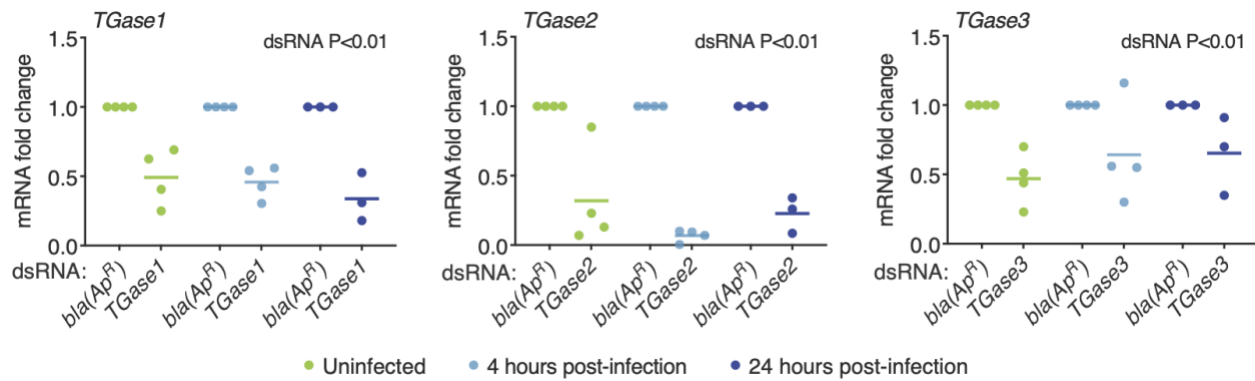

**Supplementary Figure S1.** RNAi-based knockdown efficiency of *TGase1*, *TGase2* and *TGase3*. Graphs show the relative mRNA abundance in mosquitoes treated with *dsbla(Ap<sup>R</sup>)*-, *dsTGase1*-, *dsTGase2*- and *dsTGase3* that were uninfected or had been infected with GFP-*E. coli* for 4 or 24 hr. Each circle is an independent biological trial, and the value is the average mRNA abundance relative to the *dsbla(Ap<sup>R</sup>)* group across 2-3 technical replicates within that trial. The horizontal lines mark the means. Data were analyzed by two-way ANOVA, and the P-value indicating the effect of dsRNA treatment.

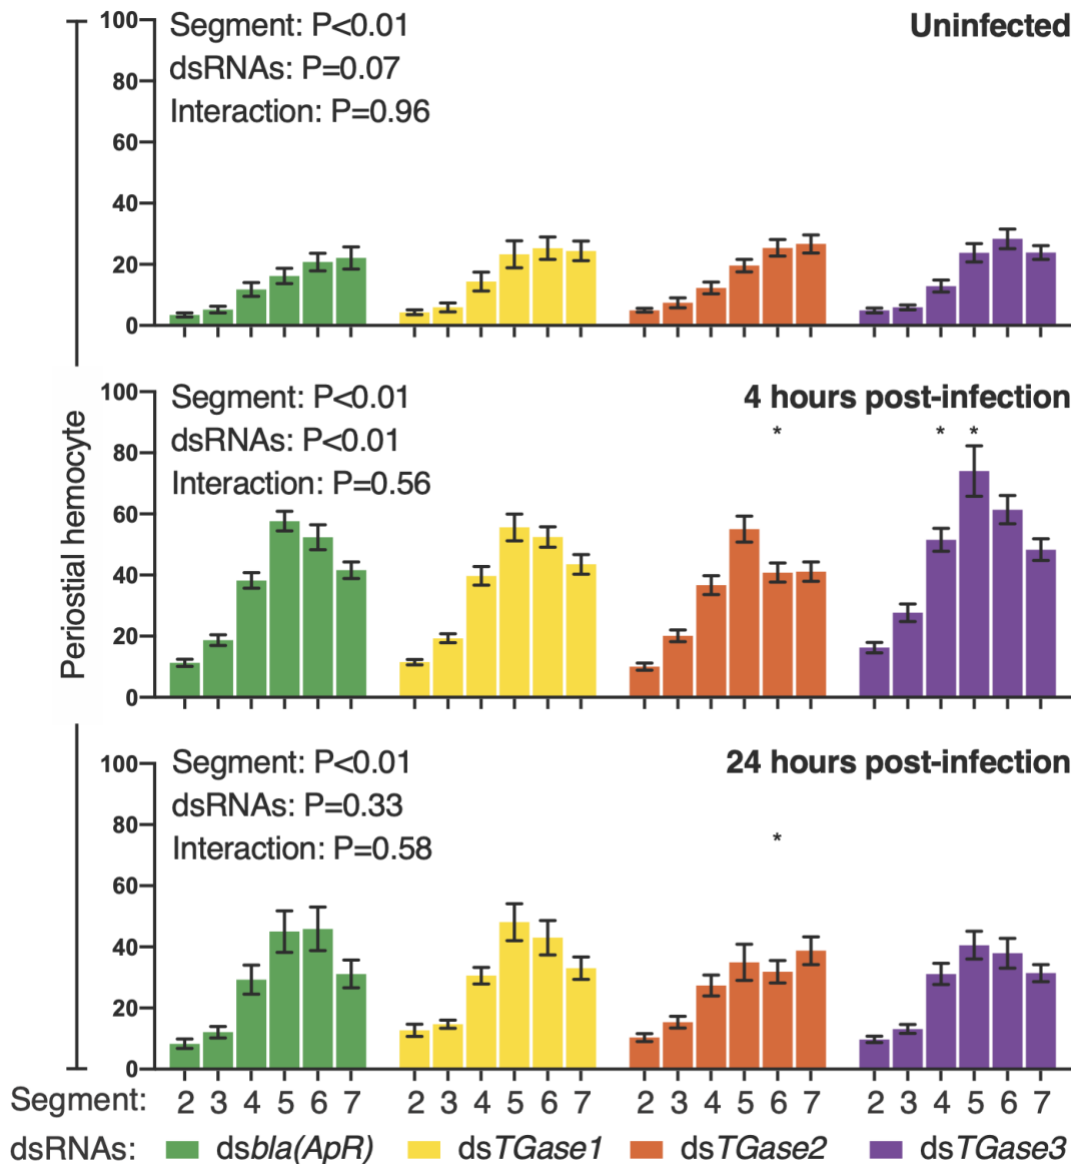

**Supplementary Figure S2.** RNAi-based knockdown of transglutaminase genes does not alter the relative spatial distribution of periostial hemocytes. Graph shows the average number of periostial hemocytes in each periostial region of abdominal segments 2-7 in *dsbla(Ap<sup>R</sup>)*-, *dsTGase1*-, *dsTGase2*- and *dsTGase3*-injected mosquitoes that were uninfected or had been infected with GFP-*E. coli* for 4 or 24 hr. Data were analyzed by two-way ANOVA followed by Dunnett's post-hoc test, using *dsbla(Ap<sup>R</sup>)* mosquitoes as the reference. Column heights mark the means and whiskers show the S.E.M. Asterisks indicate post-hoc  $P < 0.05$ , using *dsbla(Ap<sup>R</sup>)* mosquitoes of the same segment as the reference.
